# Supplementary material for: An electrochemical impedance aptasensor based on selenomolybdate nanodot/antimonene hybrid for platelet-derived growth factor-BB
Source: Royal Society of Chemistry journal article supplement (doi:10.1039/d2tb02498e), 2023-01-01
Supplement: d2tb02498e1.pdf [file d2tb02498e1.pdf]

**Electrochemical impedance aptasensor based on selenomolybdate  
nanodots/antimonene hybrid for platelet derived growth factor-BB**

Shobhita Singal<sup>†1</sup>, Ashish Yadav<sup>†1</sup>, Kajal Sharma<sup>2</sup>, Meenakshi Sharma<sup>\*\*2</sup>, Raj Kishore Sharma<sup>\*1</sup>

<sup>1</sup>*Department of Chemistry, University of Delhi, Delhi-110 007*

<sup>2</sup>*Dr B.R. Ambedkar Center for Biomedical Research, University of Delhi, Delhi 110007*

**\*Corresponding author:** Raj K. Sharma ([drrajsharma@yahoo.co.in](mailto:drrajsharma@yahoo.co.in))

**\*\*Co-corresponding author:** M. Sharma ([meenakshisharma@acbr.du.ac.in](mailto:meenakshisharma@acbr.du.ac.in))

**†** Both authors contributed equally

## Supporting Information

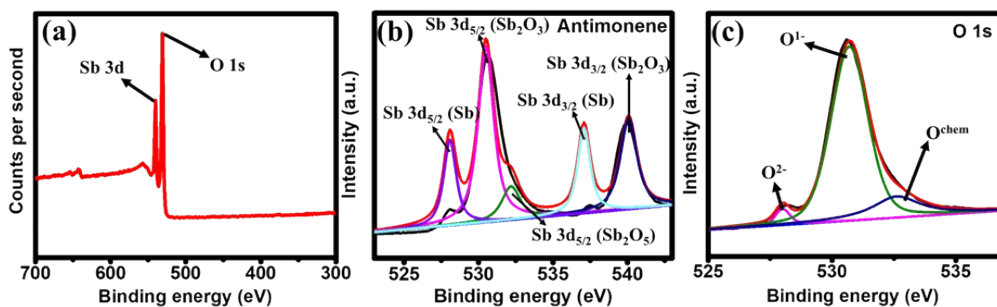

**Figure S1:** (a) Survey spectrum of antimonene; (b) X-ray photoelectron spectrum of Sb in antimonene; (c) O 1s spectrum.

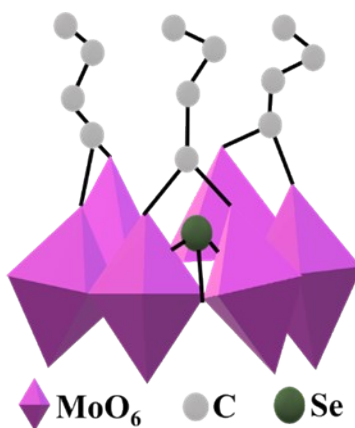

**Figure S2:** Polyhedral representation of  $[(\text{SeMo}_6\text{O}_{21})(\text{COO}(\text{CH}_2)_2\text{COO})_3]^{6-}$  polyoxometalate

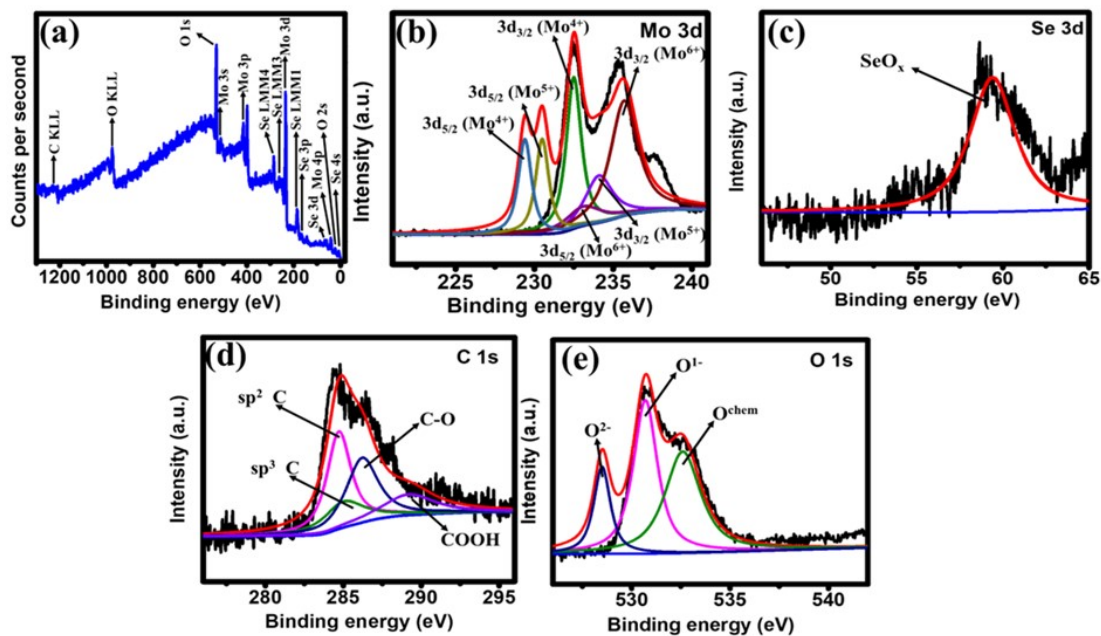

**Figure S3:** (a) Survey spectrum of POM; X-ray photoelectron spectrum of (b) Mo 3d; (c) Se 3d; (d) C 1s; (e) O 1s in POM.

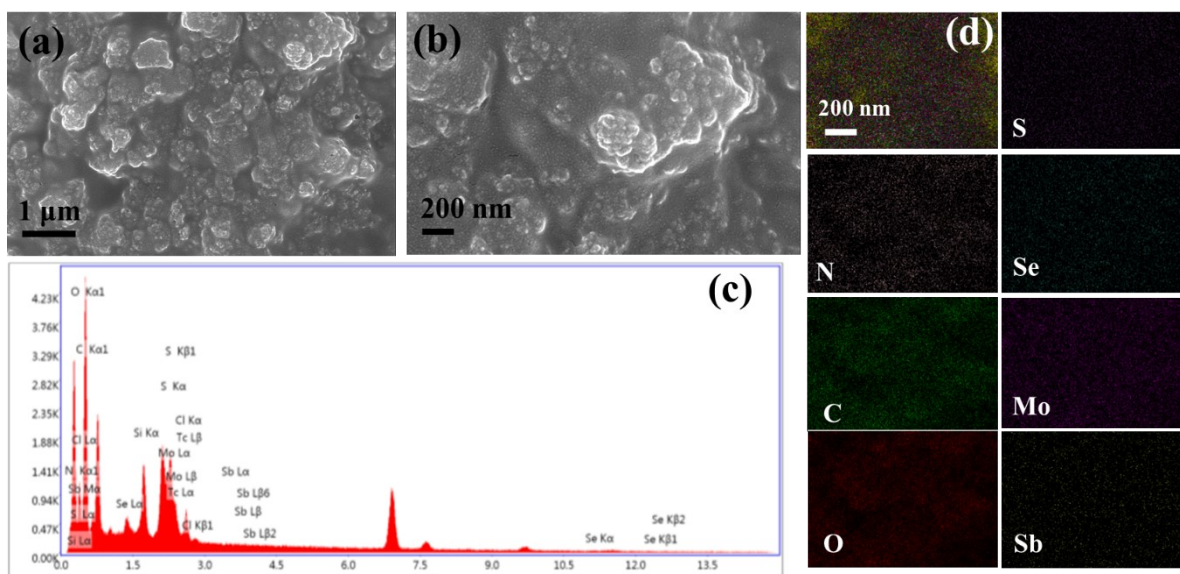

**Figure S4:** (a, b) FESEM image of BSA/aptamer-POM(SA)/antimonene on Si wafer at different magnifications; (c, d) corresponding EDAX and elemental mapping of different elements.

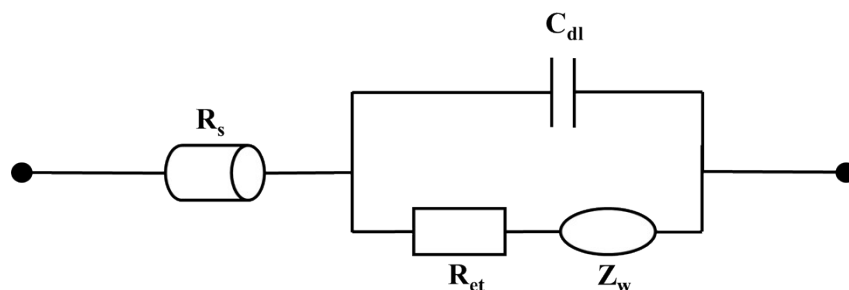

**Figure S5:** Randle's equivalent circuit

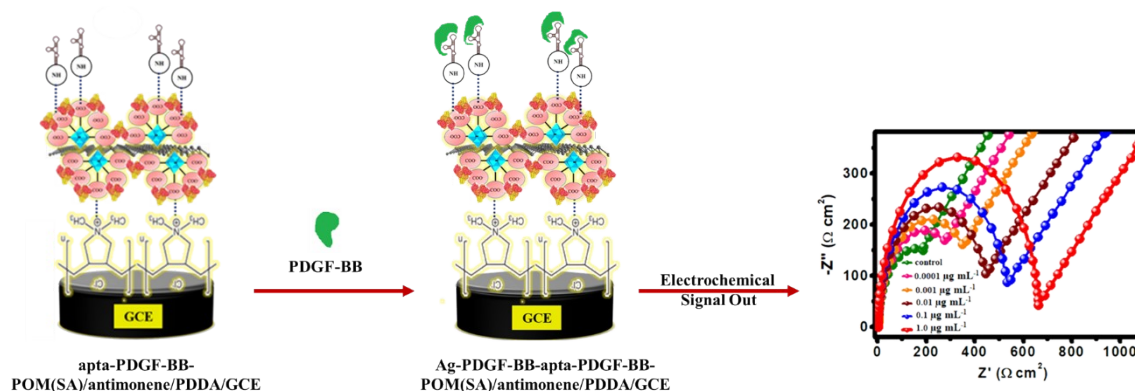

**Figure S6:** Schematic of immunoreaction at the electrode surface

### Details of Dissociation constant ( $K_D$ ) calculation for antigen-aptamer complex

The surface coverage can be calculated by comparing the charge transfer resistance ( $R_{et}$ ) or capacitance ( $C_{dl}$ ) to the value of  $K_d$ . We employed the  $R_{et}$  component for  $K_d$  measurement because minor variations in capacitance values were observed, thus we used a Langmuir adsorption isotherm and a linear relationship between the surface coverage ( $\Theta$ ) and  $R_{et-1}$  by Eqn. (1) & (2).

$$\Delta R_{et-1} = \Theta (\Delta R_{et-1})_{\max} \quad (1)$$

$$\text{where } \Delta R_{\text{et-1}} = [(R_{\text{et-1}})_{\Theta=0} - R_{\text{et-1}}] / (R_{\text{et-1}})_{\Theta=0} \quad (2)$$

$$\text{and } \Delta(R_{\text{et-1}})_{\text{max}} = [(R_{\text{et-1}})_{\Theta=0} - (R_{\text{et-1}})_{\text{max}}] / (R_{\text{et-1}})_{\Theta=0} \quad (3)$$

To avoid data overloading at low protein concentrations, the  $R_{\text{et}}$  change was converted to the Hanes-Woolf form, which may be characterized by Eqn. (4)

$$[X] / \Delta R_{\text{et-1}} = [X] / \Delta(R_{\text{et-1}})_{\text{max}} + K_d / \Delta(R_{\text{et-1}})_{\text{max}} \quad (4)$$

Where in the value of  $K_d$  was obtained by division of intercept by slope obtained from the Hanes-Woolf plot shown in Fig.9a of manuscript.
